# Supplementary material
Source: PubMed Central journal article supplement (PMC3257190)
Supplement: neo1312_1152SD1.pdf [file neo1312_1152SD1.pdf]

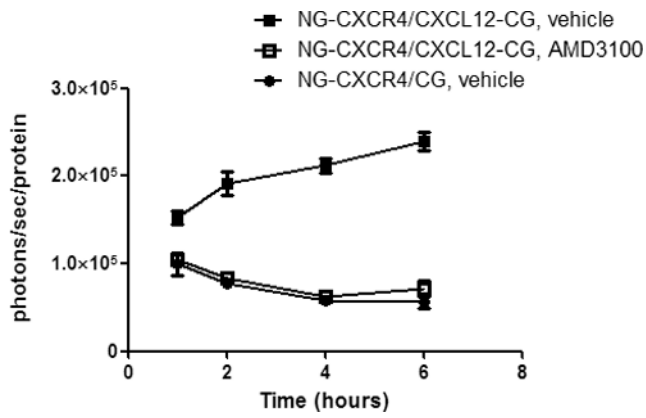

**Figure W1.** Cocultures of HeyA8-CXCL12-CG/NG-CXCR4 cells were treated for increasing periods through 6 hours with  $1 \mu\text{M}$  AMD3100 or matched volume of PBS vehicle control. Parallel cocultures of HeyA8-CG/NG-CXCR4 cells were incubated with PBS vehicle control for the same periods. Photons from *Gaussia* luciferase bioluminescence were quantified and normalized to total protein per well. Data were presented as mean values  $\pm$  SEM ( $n = 4$  per condition).

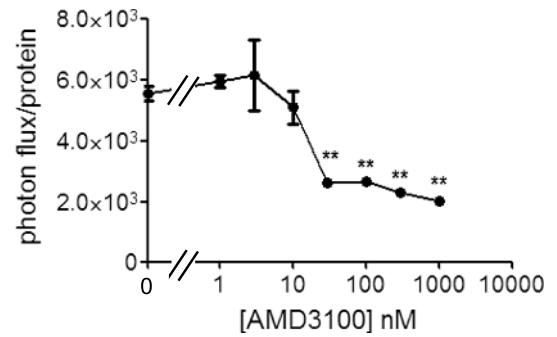

**Figure W3.** HeyA8-CXCL12-CG and NG-CXCR4 cells were recovered from ascites of mice treated with AMD3100. Mixtures of cells recovered from mice were treated for 2 hours with increasing concentrations of AMD3100 before quantifying bioluminescence from *Gaussia* luciferase complementation ( $n = 4$  per condition). Data were normalized to relative amounts of total protein per well and graphed as mean values  $\pm$  SEM.  $**P < .01$ .

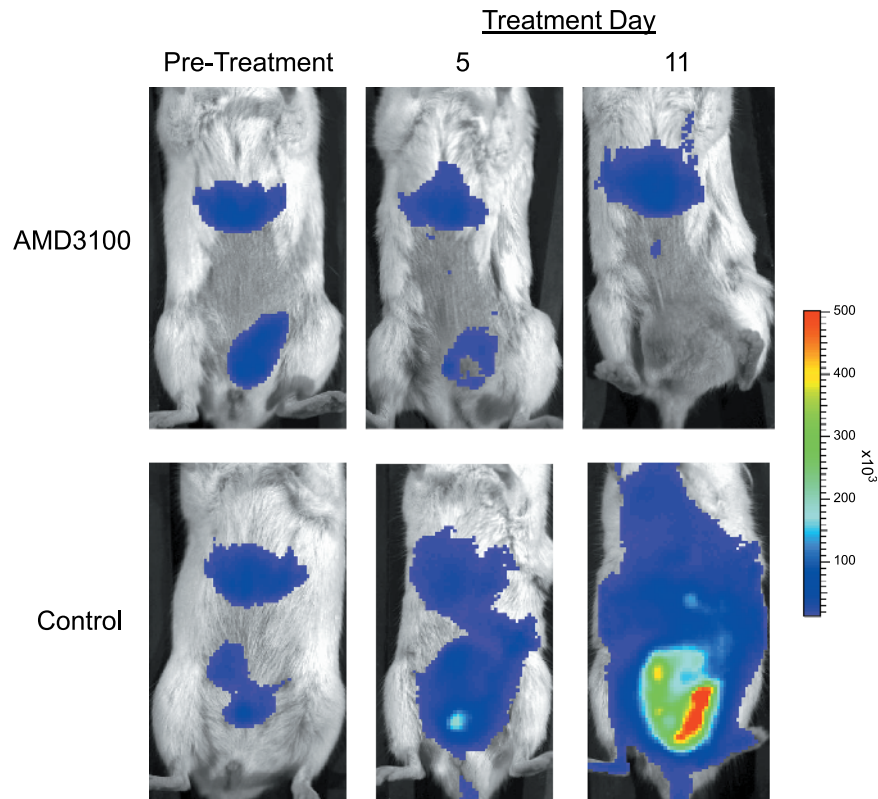

**Figure W2.** Representative bioluminescence images for *Gaussia* luciferase complementation between CXCL12-CG and NG-CXCR4 in mice are shown before (pretreatment) and during treatment with AMD3100 or vehicle control. Images were obtained on days 5 and 11 of treatment. Scale bar denotes range of pseudocolors used to depict photon flux for all images.
